# Supplementary material
Source: Springer Nature journal article supplement (https://www.springermedizin.de/resource/supplementary/12916_2013_888_MOESM27_ESM.pdf/9598866)

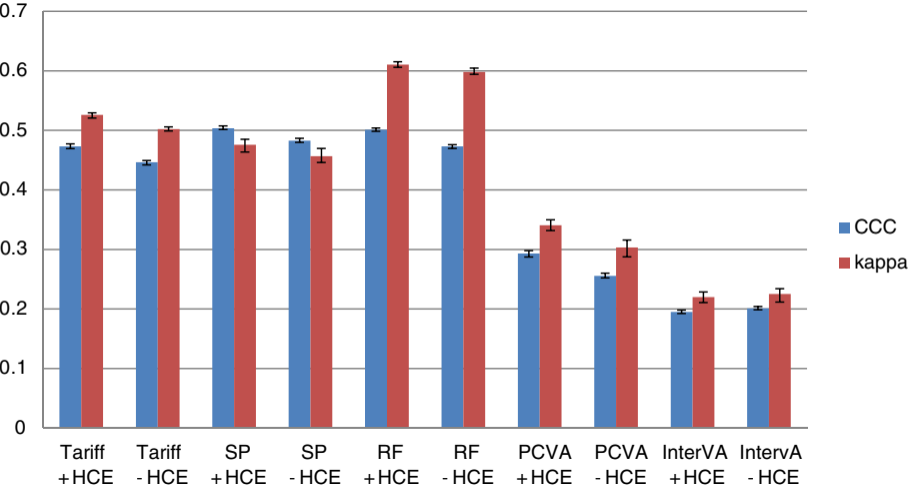

Supplement: MOESM27 [file 9598866]
